# Supplementary material for: LRP-1 Matricellular Receptor Involvement in Triple Negative Breast Cancer Tumor Angiogenesis
Source: MDPI journal article supplement (doi:10.3390/biomedicines9101430), 2021-10-09
Supplement: s1 [file s1]

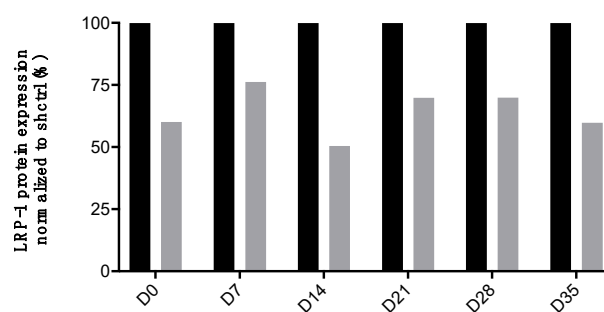

**Figure S1.** LRP-1 targeted shRNA stability over time. Densitometric analysis of LRP-1 immunoblot in shLRP-1 MDA-MB-231 cells normalized to shCtrl over time without Geneticin<sup>TM</sup> (G418 Sulfate) selection pressure (n=1).

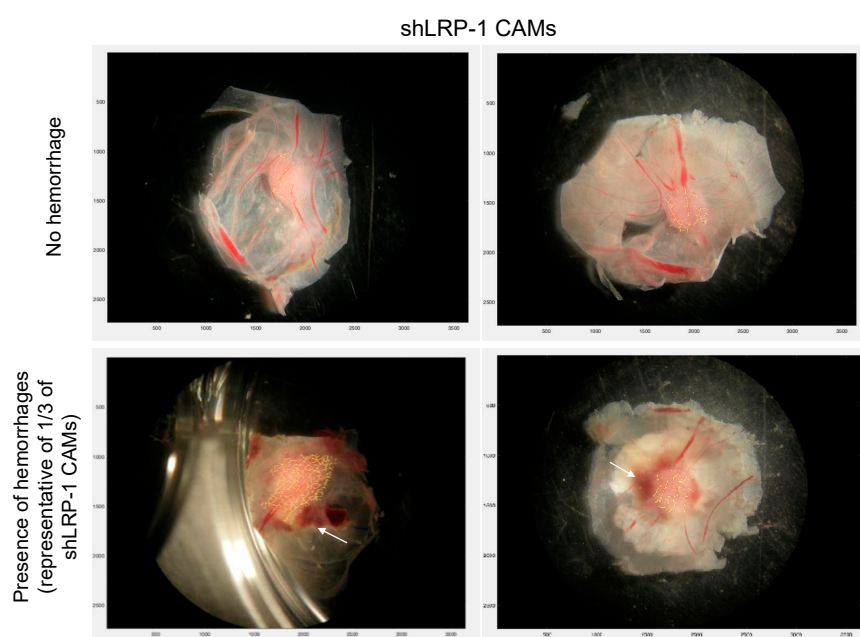

**Figure S2.** Hemorrhages in shLRP-1 CAMs. (upper panels) Representative macrophotographs of shLRP-1 CAMs without bleeding. (bottom panels) Representative hemorrhage profiles of 1/3 of shLRP-1 CAMs. The bleeding is located by an arrow.

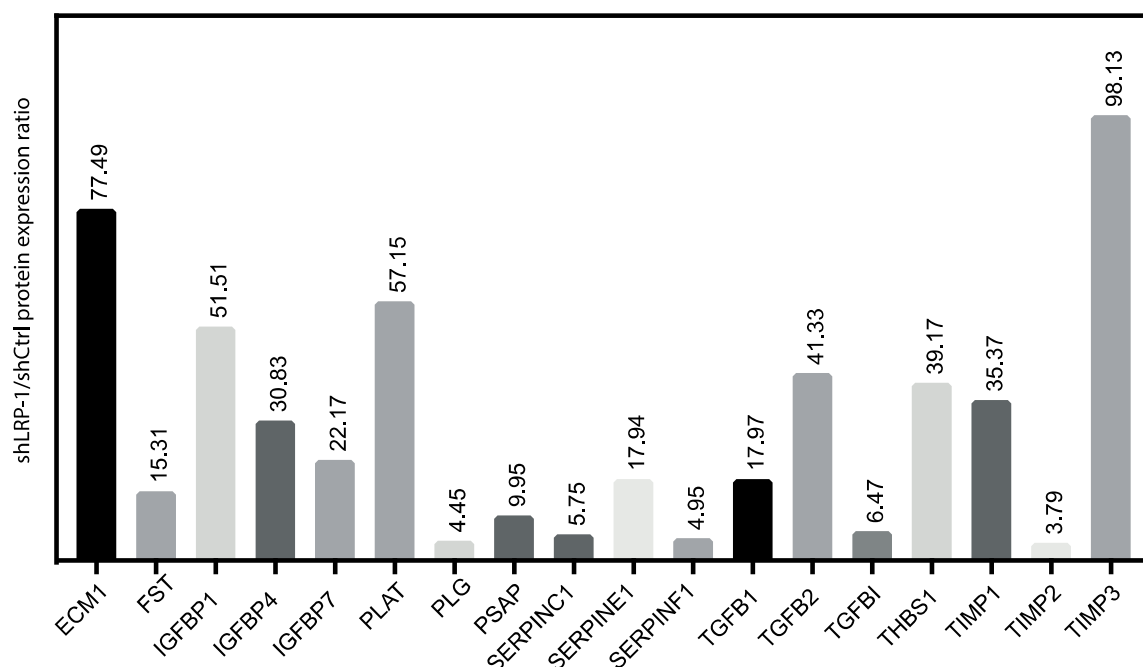

**Figure S3.** Proteomic enrichment in shLRP-1 secretome. shLRP-1/shCtrl ratio of proteins of interest from proteomics analysis with Proline. All published ratios are significant ( $p \leq 0.05$ ). ECM1= Extracellular Matrix Protein 1 ; FST= Follistatin; IGFBP1= Insulin-like growth factor-binding protein 1 ; IGFBP4= Insulin Like Growth Factor Binding Protein 4 ; IGFBP7= Insulin-like growth factor-binding protein 7 ; PLAT= Plasminogen Activator Tissue Type ; PLG= Plasminogen ; PSAP= Prosaposin ; SERPINC1= Serpin Family C Member 1 or Antithrombin ; SERPINE1= Serpin Family E Member 1 or PAI-1 (plasminogen activator inhibitor type I) ; SERPINF1= Serpin Family F Member 1 or PEDF (Pigment epithelium-derived factor); TGFB1= Transforming growth factor beta 1 ; TGFB2= Transforming growth factor beta-2 ; TGFBI= Transforming growth factor beta-induced ; THBS1= Thrombospondin 1 ; TIMP1= TIMP Metalloproteinase Inhibitor 1 ; TIMP2= TIMP Metalloproteinase Inhibitor 2 ; TIMP3= TIMP Metalloproteinase Inhibitor 3.

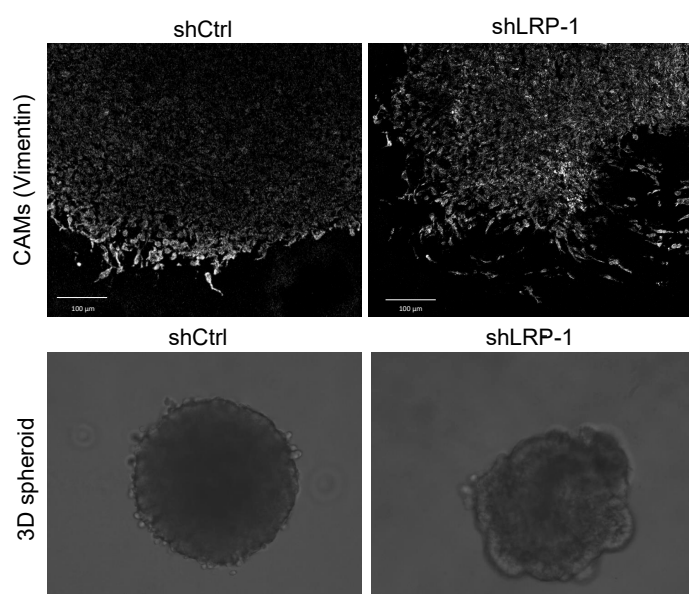

**Figure S4.** Morphological profile of shLRP-1 CAMs and 3D spheroid. (top panels) Representative microphotography of vimentin immunofluorescence staining in shCtrl and shLRP-1 CAMs. Scale bar: 100µm. (bottom panels) Representative microphotographs of 3D shCtrl and shLRP-1 spheroid 48h after formation. Scale bar: 275µm.

**Table S1.** Primer sequences used for qRT-PCR analysis genes. 1 NCBI accession number.

| Gene         | Name                                             | Accession number <sup>1</sup> | Forward Primer (5'-3') | Reverse primer (5'-3') | Annealing temperature (°C) | Amplicon size (bp) |
|--------------|--------------------------------------------------|-------------------------------|------------------------|------------------------|----------------------------|--------------------|
| <i>LRP-1</i> | LDL receptor related protein 1                   | NM_002332.3 <sup>1</sup>      | GCTATCGACGCCCTAAGAC    | CGCCAGCCCTTGAGATACA    | 60                         | 80                 |
| <i>RS18</i>  | ribosomal protein 18 40S small ribosomal subunit | NM_022551.2 <sup>1</sup>      | GCAGAATCCACGCCAGTACAA  | GCCAGTGGTCTTGGTGTGCT   | 60                         | 208                |
| <i>RPL32</i> | 60S ribosomal protein L32                        | NM_000994.4 <sup>1</sup>      | CATTGGTTATGGAAGCAACAAA | TTCTTGGAGGAAACATTGTGAG | 60                         | 150                |
